# Supplementary material for: Meta-analysis of genome-wide association study identifies FBN2 as a novel locus associated with systemic lupus erythematosus in Thai population
Source: Arthritis Res Ther. 2020 Aug 8;22:185. doi: 10.1186/s13075-020-02276-y (PMC7414652; doi:10.1186/s13075-020-02276-y)
Supplement: Supplementary file 3 — Additional file 3. Supplementary Table 2: List of HWE of significant variants (p-value < 5E-5) [file 13075_2020_2276_MOESM3_ESM.xlsx]

## Sheet: Variants <10E-5
Supplementary Table 2 List of HWE of significant variants (p-value < 5E-5)
HAP a	dbSNP c	CHRb	BP e	Locus	Locus up	Locus down	A1	A2	Observatory cohort			Replication cohort
									Freq. Genotype	HWE	P	Freq. Genotype	HWE	P
p36.32	rs607850	1	4521563		RP5-1166F10.1	RP1-37J18.1	G	A	7/221/1358	0.1372	0.7131	8/184/1393	0.1182	0.3999
p36.31	rs61759086	1	5453405		RP11-542C10.1	RP1-58B11.1	A	G	7/159/1419	0.1032	0.228	1/137/1445	0.08395	0.3637
p36.11	rs12749677	1	26485123		HMGN2	DPPA2P2	A	G	53/462/1069	0.2943	0.7326	61/508/1016	0.3185	0.8746
p31.1	rs12135469	1	70299976	ANKRD13C			A	G	6/164/1416	0.1048	0.6272	5/145/1435	0.09301	0.4215
p13.1	rs1004986	1	117059274	RP11-27K13.3			A	G	11/213/1303	0.1421	0.4691	8/208/1307	0.1363	1
q24.3	rs9425824	1	171915030	DNM3			G	A	0/106/1480	0.0646	0.4177	1/80/1503	0.05043	1
q25.1	rs1234315	1	173209324		TNFSF4	snoU13	A	G	315/777/492	0.4938	0.7992	331/786/468	0.4963	1
q25.2	rs67269402	1	178943270		RALGPS2	FAM20B	A	G	136/678/771	0.4197	0.4729	120/656/809	0.4055	0.4572
q25.3	rs13306575	1	183563302	SMG7			A	G	12/228/1346	0.1463	0.4902	11/219/1355	0.1405	0.4743
q44	rs6661897	1	247180692		RP11-488L18.6	RP11-488L18.3	G	A	370/793/422	0.4995	0.9599	356/797/431	0.4989	0.7625
q44	rs10449733	1	247906196		OR2W3	OR2T8	G	A	0/104/1477	0.06362	0.4119	1/83/1499	0.05225	1
p25.1	rs77707012	2	8330392	LINC00299			A	G	1/50/1497	0.03303	0.3531	1/72/1492	0.04617	0.5868
p24.2	rs12620793	2	17883631	KCNS3			G	A	230/728/628	0.4685	0.4216	274/756/554	0.4844	0.5683
p22.3	rs13385731	2	33476823	RASGRP3			G	A	39/456/1088	0.2804	0.3239	50/450/1081	0.2874	0.7261
p13.3	rs17720303	2	70936043	ATP6V1B1			A	G	64/502/1019	0.3185	0.8131	52/483/1049	0.3019	0.7396
q12.1	rs1433310	2	103359324		AC073987.2	AC092568.1	G	A	1/26/1549	0.01761	0.1139	1/38/1532	0.02514	0.2223
q22.1	rs12465074	2	140581211	LRP1B			G	A	130/641/815	0.4067	0.805	118/622/845	0.3948	0.7993
q32.2	rs7603849	2	190574015		AC093388.3	NAB1	C	A	180/711/691	0.4478	0.9107	151/721/710	0.4376	0.1076
q32.3	rs3821236	2	191038032	STAT4			A	G	262/799/522	0.4865	0.148	277/785/522	0.488	0.5712
q32.3	rs1517352	2	191066738	STAT4			C	A	404/805/376	0.4998	0.5466	408/785/392	0.4999	0.7251
q32.3	rs10168266	2	191071078	STAT4			A	G	174/767/645	0.4559	0.0178	202/734/649	0.4602	0.8273
q32.3	rs7601754	2	191075725	STAT4			G	A	16/370/1200	0.2213	0.031	29/358/1198	0.228	0.6607
q32.3	rs11889341	2	191079016	STAT4			A	G	196/771/619	0.4644	0.06618	212/742/631	0.4651	0.829
q32.3	rs6434435	2	191089138	STAT4			A	G	8/247/1330	0.1522	0.4104	9/262/1314	0.1611	0.3508
q32.3	rs10931480	2	191089321	STAT4			G	A	8/249/1329	0.1531	0.4109	9/262/1314	0.1611	0.3508
q32.3	rs7574865	2	191099907	STAT4			A	C	196/769/606	0.4659	0.05117	196/737/640	0.4602	0.5108
q32.3	rs12463658	2	191100618	STAT4			A	C	386/830/370	0.4999	0.07052	394/806/384	0.5	0.5135
q32.3	rs13407419	2	191103694	STAT4			C	A	6/228/1336	0.1412	0.3682	7/244/1322	0.1506	0.3127
q32.3	rs10181656	2	191105153	STAT4			G	C	209/773/603	0.4691	0.1207	202/744/639	0.462	0.5499
q32.3	rs7582694	2	191105394	STAT4			C	G	203/779/604	0.468	0.05343	206/744/635	0.4634	0.6259
q32.3	rs10174238	2	191108308	STAT4			G	A	205/743/631	0.4636	0.5873	175/712/688	0.447	0.6931
q32.3	rs2358030	2	194125810		AC068135.1	GLULP6	A	G	95/588/903	0.3702	1	107/580/897	0.3756	0.3159
p24.3	rs11128887	3	18380498	TBC1D5			G	A	0/72/1513	0.04439	1	0/56/1526	0.03477	1
q12.2	rs17395659	3	100295762	TBC1D23			A	G	4/129/1453	0.08265	0.5335	4/138/1442	0.08792	0.5731
q21.1	rs76458540	3	123468216		ADCY5	PTPLB	G	A	2/101/1483	0.06401	0.6894	2/128/1454	0.07986	1
q26.32	rs73173171	3	177467523	LINC00578			A	G	81/527/977	0.3402	0.3755	55/495/1034	0.309	0.6851
q27.3	rs7647225	3	186322162	DGKG			A	G	312/814/460	0.4956	0.1713	303/777/503	0.492	0.9187
q29	rs115520289	3	196999031	MFI2			A	G	1/29/1496	0.02011	0.1426	2/47/1511	0.03216	0.06125
p15.32	rs190128439	4	17087941		RP11-141E13.1	RP11-576E20.1	G	A	0/37/1549	0.02306	1	0/28/1557	0.01751	1
p15.2	rs34676227	4	24818492	CCDC149			A	G	1/112/1473	0.0693	0.7195	2/71/1512	0.0462	0.2174
q24	rs4352484	4	100212352	RP11-588P8.1			G	A	15/255/1316	0.1636	0.4456	6/205/1374	0.1275	0.6961
q31.3	rs7668917	4	152099409		RNA5SP169	RP11-18H21.1	A	C	101/559/926	0.3647	0.1906	64/523/998	0.3264	0.7008
q31.3	rs6535836	4	152101140	RP11-18H21.1			A	G	102/558/926	0.365	0.1489	64/523/998	0.3264	0.7008
q31.3	rs13140099	4	152101223	RP11-18H21.1			A	G	50/413/1123	0.2711	0.1155	28/416/1139	0.2537	0.1664
q31.3	rs6535837	4	152101748	RP11-18H21.1			G	A	102/558/926	0.365	0.1489	64/523/998	0.3264	0.7008
q35.2	rs11132621	4	189228323		RP11-706F1.1	RP11-706F1.2	G	A	19/360/1204	0.2198	0.2074	21/351/1201	0.2186	0.4887
q35.2	rs11132622	4	189228346		RP11-706F1.1	RP11-706F1.2	A	G	19/364/1201	0.2216	0.1725	22/356/1205	0.2208	0.5684
q35.2	rs11132627	4	189228942		RP11-706F1.1	RP11-706F1.2	G	A	19/358/1208	0.2186	0.2074	22/352/1211	0.2186	0.6453
q35.2	rs73029650	4	189229260		RP11-706F1.1	RP11-706F1.2	G	A	19/355/1209	0.2174	0.2477	22/350/1212	0.2178	0.6447
p15.33	rs7725218	5	1282299	TERT			A	G	253/756/576	0.4792	0.875	233/693/657	0.4641	0.02632
p15.33	rs2736100	5	1286401	TERT			C	A	343/775/463	0.4971	0.5781	311/750/523	0.491	0.1523
p15.33	rs13361736	5	3000060		RP11-35O7.1	CTD-2029E14.1	A	G	2/86/1498	0.05514	0.3626	2/48/1532	0.03233	0.06409
p15.33	rs11747688	5	3000871		RP11-35O7.1	CTD-2029E14.1	G	A	9/175/1402	0.1143	0.1815	3/148/1433	0.0925	1
q21.1	rs7708845	5	99122405		CTD-2007H13.3	RP11-93O17.1	A	G	19/300/1267	0.1904	0.7916	19/267/1298	0.174	0.1958
q23.3	rs76835745	5	128282950	FBN2			A	G	9/212/1365	0.1345	0.7108	12/197/1375	0.1298	0.1166
q23.3	rs74989671	5	128398268	FBN2			G	A	26/337/1216	0.216	0.6407	25/288/1267	0.191	0.08502
q23.3	rs35983844	5	128455668	FBN2			G	A	23/358/1186	0.2246	0.5738	25/294/1255	0.1947	0.1188
q23.3	rs6595836	5	128525194	FBN2			A	G	38/380/1168	0.2462	0.3069	39/315/1231	0.2172	0.001603
p24.2	rs4713527	6	11460969	RP11-716O23.1			A	G	114/536/936	0.3657	0.003091	102/610/873	0.3817	0.7924
p22.3	rs2747676	6	24913561	FAM65B			A	C	141/675/770	0.4214	0.7208	122/626/837	0.3983	0.7525
p22.1	rs1633041	6	29765446		XXbac-BPG170G13.31	HLA-V	A	G	10/220/1354	0.14	0.7187	4/142/1434	0.09043	0.7773
p22.1	rs2735044	6	29767614		XXbac-BPG170G13.31	HLA-V	G	A	4/220/1356	0.1339	0.1325	3/142/1439	0.08907	1
p22.1	rs9258288	6	29767678		XXbac-BPG170G13.31	HLA-V	A	C	10/220/1355	0.14	0.7186	4/142/1437	0.09027	0.7771
p22.1	rs1737045	6	29768002		XXbac-BPG170G13.31	HLA-V	G	A	10/220/1356	0.1399	0.7185	4/142/1439	0.09016	0.7769
p22.1	rs1737041	6	29768452		XXbac-BPG170G13.31	HLA-V	A	C	10/220/1356	0.1399	0.7185	4/142/1439	0.09016	0.7769
p22.1	rs1737037	6	29769015		XXbac-BPG170G13.31	HLA-V	A	G	10/220/1354	0.14	0.7187	4/142/1437	0.09027	0.7771
p22.1	rs1737032	6	29769445		XXbac-BPG170G13.31	HLA-V	C	A	10/220/1356	0.1399	0.7185	4/142/1439	0.09016	0.7769
p22.1	rs885939	6	29771495		XXbac-BPG170G13.31	HLA-V	G	A	9/220/1354	0.139	1	4/142/1438	0.09021	0.777
p22.1	rs885938	6	29771545		XXbac-BPG170G13.31	HLA-V	C	A	10/220/1356	0.1399	0.7185	4/142/1438	0.09021	0.777
p22.1	rs1419641	6	29775069		XXbac-BPG170G13.31	HLA-V	A	G	10/220/1343	0.1409	0.72	4/142/1421	0.09114	0.7785
p22.1	rs1633021	6	29779092		XXbac-BPG170G13.31	HLA-V	G	A	8/172/1405	0.1116	0.2579	1/103/1481	0.06405	1
p22.1	rs1737013	6	29788524		XXbac-BPG170G13.31	HLA-V	G	A	9/200/1354	0.1297	0.5569	4/130/1435	0.08409	0.5396
p22.1	rs1611196	6	29790218		XXbac-BPG170G13.31	HLA-V	G	A	10/222/1354	0.1409	0.722	4/141/1439	0.08964	0.7753
p22.1	rs1610643	6	29791533	HLA-V			A	G	10/219/1357	0.1393	0.717	4/141/1439	0.08964	0.7753
p22.1	rs1611208	6	29792108	HLA-V			A	G	10/219/1355	0.1395	0.7172	4/141/1439	0.08964	0.7753
p22.1	rs1633011	6	29794916	HLA-V			A	G	10/219/1356	0.1394	0.7171	4/141/1440	0.08959	0.7752
p22.1	rs1737002	6	29795126	HLA-V			A	G	10/188/1353	0.1251	0.2198	3/129/1430	0.08269	0.7642
p22.1	rs1737000	6	29796771	HLA-V			G	A	6/219/1347	0.1361	0.459	1/142/1436	0.08704	0.2533
p22.1	rs1629068	6	29797514	HLA-V			G	A	10/219/1356	0.1394	0.7171	4/141/1439	0.08964	0.7753
p22.1	rs1610711	6	29801720	HLA-P			C	A	10/219/1356	0.1394	0.7171	4/141/1440	0.08959	0.7752
p22.1	rs1610714	6	29802052	HLA-P			G	A	8/215/1354	0.1358	1	4/141/1438	0.0897	0.7754
p22.1	rs1611192	6	29804102		RPL7AP7	MICG	G	A	8/171/1407	0.111	0.2535	1/102/1482	0.06346	1
p22.1	rs1632988	6	29804618		RPL7AP7	MICG	A	G	10/219/1357	0.1393	0.717	4/140/1440	0.08907	0.7737
p22.1	rs1632987	6	29804772		RPL7AP7	MICG	G	C	10/219/1356	0.1394	0.7171	4/141/1439	0.08964	0.7753
p22.1	rs1624302	6	29806177		RPL7AP7	MICG	G	A	10/219/1357	0.1393	0.717	4/141/1439	0.08964	0.7753
p22.1	rs1736973	6	29807569		RPL7AP7	MICG	G	A	10/219/1354	0.1396	0.7173	4/141/1440	0.08959	0.7752
p22.1	rs1632976	6	29808462		RPL7AP7	MICG	G	A	10/219/1356	0.1394	0.7171	4/141/1438	0.0897	0.7754
p22.1	rs1736971	6	29808545		RPL7AP7	MICG	A	C	11/208/1357	0.1353	0.3479	5/132/1438	0.08609	0.2445
p22.1	rs1736967	6	29809101		RPL7AP7	MICG	A	G	9/219/1357	0.1383	0.857	3/141/1440	0.0885	1
p22.1	rs1736963	6	29810206		RPL7AP7	MICG	A	G	10/219/1341	0.1406	0.7187	4/141/1437	0.08975	0.7754
p22.1	rs1610697	6	29810642		RPL7AP7	MICG	G	A	10/219/1356	0.1394	0.7171	4/141/1439	0.08964	0.7753
p22.1	rs753544	6	29812752		MICG	HLA-G	A	G	10/215/1355	0.1377	0.5844	4/141/1438	0.0897	0.7754
p22.1	rs1610674	6	29814109		MICG	HLA-G	A	G	0/225/1354	0.1323	0.0003762	1/144/1434	0.08819	0.2533
p22.1	rs1077432	6	29815091		MICG	HLA-G	G	A	10/219/1341	0.1406	0.7187	4/141/1433	0.08997	0.7757
p22.1	rs1736948	6	29818643		MICG	HLA-G	A	G	11/212/1343	0.1383	0.3631	5/140/1434	0.09048	0.3968
p22.1	rs1610682	6	29833547		HLA-G	MICF	G	A	6/186/1394	0.117	1	3/124/1458	0.07866	0.7455
p22.1	rs1116221	6	30103553	TRIM31			A	G	13/213/1360	0.1393	0.1484	3/133/1448	0.0839	1
p22.1	rs2248289	6	30104944	TRIM31			G	A	7/185/1394	0.1176	0.6696	2/114/1469	0.07168	1
p22.1	rs62390186	6	30106665	TRIM31-AS1			A	T	215/749/621	0.4672	0.6674	225/738/622	0.4686	0.7889
p22.1	rs62390201	6	30113853	TRIM31-AS1			A	G	227/757/601	0.4722	0.6706	236/751/597	0.474	1
p22.1	rs17188015	6	30144420	TRIM40			A	G	238/762/586	0.4759	0.7515	243/749/593	0.4756	0.7919
p22.1	rs3815081	6	30146297	TRIM40			G	A	244/762/580	0.4776	0.8335	251/748/585	0.4778	0.6364
p22.1	rs17188113	6	30163346	TRIM15			C	A	239/730/587	0.475	0.6311	250/728/584	0.4771	0.3674
p22.1	rs2074477	6	30164258	TRIM15			A	G	245/753/588	0.4766	0.8745	256/742/586	0.4783	0.4306
p22.1	rs41272591	6	30171076	TRIM15			A	C	243/754/589	0.4762	0.958	255/741/589	0.4778	0.4003
p21.33	rs3095341	6	30758971		RN7SL353P	HCG20	A	G	48/497/1041	0.304	0.2474	75/533/976	0.3382	0.8238
p21.33	rs3869075	6	30759505		RN7SL353P	HCG20	C	G	139/649/798	0.4137	0.671	126/622/837	0.3994	0.4892
p21.33	rs13214831	6	30763728		RN7SL353P	HCG20	A	G	137/643/806	0.411	0.5827	122/615/847	0.3953	0.4845
p21.33	rs12526186	6	30768374	HCG20			A	G	137/636/792	0.4124	0.5811	121/611/845	0.3946	0.4827
p21.33	rs13217914	6	30769775	HCG20			A	G	126/618/842	0.3981	0.4121	117/612/856	0.3913	0.6076
p21.33	rs17481190	6	30775237	HCG20			A	G	127/614/843	0.3978	0.3123	104/605/872	0.382	1
p21.33	rs7740279	6	30792919		HCG20	LINC00243	G	A	55/517/1014	0.3172	0.3033	77/545/960	0.3442	1
p21.33	rs3131787	6	30931747	SFTA2			G	A	1/60/1523	0.03838	0.456	0/30/1554	0.01876	1
p21.33	rs3095152	6	30931873	SFTA2			A	G	0/57/1528	0.03532	1	0/24/1561	0.01503	1
p21.33	rs3095151	6	30932373		SFTA2	Y_RNA	A	C	1/60/1525	0.03833	0.4556	0/30/1555	0.01875	1
p21.33	rs3815087	6	31125810	PSORS1C1			A	G	112/564/909	0.3736	0.05981	65/524/996	0.3275	0.7591
p21.33	rs9263699	6	31125922	PSORS1C1			A	G	112/563/910	0.3733	0.05931	65/524/996	0.3275	0.7591
p21.33	rs3778640	6	31126343	PSORS1C1			C	G	29/318/1201	0.2134	0.1518	13/297/1256	0.185	0.411
p21.33	rs9263703	6	31126705	PSORS1C1			C	A	130/613/843	0.3989	0.2087	87/566/932	0.3579	0.944
p21.33	rs6932086	6	31127311	PSORS1C1			A	G	29/310/1198	0.2108	0.09071	13/298/1247	0.1863	0.3425
p21.33	rs9263715	6	31128024	PSORS1C1			A	G	129/612/843	0.3984	0.231	87/566/932	0.3579	0.944
p21.33	rs9263716	6	31128039	PSORS1C1			T	A	112/563/909	0.3734	0.05938	65/523/996	0.3273	0.7592
p21.33	rs13200022	6	31131180	PSORS1C1			A	G	63/466/1057	0.3036	0.2142	32/353/1200	0.2285	0.3218
p21.33	rs186482934	6	31131181	PSORS1C1			A	G	2/74/1464	0.04937	0.2548	3/76/1475	0.05137	0.08844
p21.33	rs3823417	6	31133092	PSORS1C1			A	G	75/517/994	0.3321	0.4502	39/403/1143	0.2574	0.6255
p21.33	rs3823418	6	31133165	PSORS1C1			A	G	65/467/1054	0.3056	0.1619	32/355/1198	0.2294	0.3257
p21.33	rs9380231	6	31267855		XXbac-BPG299F13.16	HLA-C	G	A	68/463/1055	0.3064	0.07085	95/571/919	0.3649	0.6298
p21.33	rs28894985	6	31296457	XXbac-BPG248L24.13			A	G	25/321/1239	0.2067	0.3962	17/332/1233	0.2046	0.3885
p21.33	rs2853922	6	31298413	XXbac-BPG248L24.13			A	G	117/595/873	0.3862	0.2689	93/587/905	0.3688	0.8918
p21.33	rs2524089	6	31298745	XXbac-BPG248L24.13			C	A	117/595/873	0.3862	0.2689	93/587/905	0.3688	0.8918
p21.33	rs28752870	6	31332421		XXbac-BPG248L24.10	HLA-B	A	G	108/575/902	0.3745	0.2271	82/559/944	0.3521	1
p21.33	rs117431752	6	31357897		XXbac-BPG248L24.12	DHFRP2	A	G	10/210/1366	0.1345	0.5726	10/242/1332	0.1517	1
p21.33	rs2523535	6	31368473		DHFRP2	RNU6-283P	G	A	113/573/900	0.3769	0.1095	86/602/896	0.3693	0.2761
p21.33	rs2523533	6	31368872		DHFRP2	RNU6-283P	A	G	73/481/1032	0.3172	0.08169	61/553/970	0.3353	0.1154
p21.33	rs12174396	6	31406802	HCP5			G	A	88/517/981	0.3415	0.07728	107/618/858	0.3875	0.7955
p21.33	rs112630608	6	31408660	HCP5			C	A	11/217/1355	0.1396	0.469	6/254/1320	0.1542	0.1022
p21.33	rs2596532	6	31420094	HCP5			G	C	218/724/644	0.4639	0.5165	276/796/512	0.4889	0.2807
p21.33	rs9394074	6	31529001	MCCD1			C	G	26/312/1244	0.2036	0.216	40/409/1133	0.2613	0.7001
p21.33	rs2256974	6	31587615	LST1			A	C	206/696/684	0.4546	0.1675	218/764/603	0.4705	0.364
p21.33	rs2763979	6	31826815		HSPA1A	HSPA1B	A	G	199/677/710	0.4481	0.0643	144/613/828	0.4069	0.04842
p21.32	rs12663103	6	32193547	GPSM3			G	A	22/305/1258	0.1959	0.443	15/264/1302	0.1687	0.6547
p21.32	rs6907458	6	32203511	NOTCH4			A	G	22/305/1259	0.1958	0.4428	15/269/1300	0.1709	0.7685
p21.32	rs422951	6	32220606	NOTCH4			G	A	172/674/740	0.4359	0.3274	138/601/846	0.4002	0.03828
p21.32	rs139993810	6	32335930	C6orf10			A	G	3/136/1447	0.08553	1	4/110/1470	0.07172	0.2743
p21.32	rs79044345	6	32349791	C6orf10			A	G	3/136/1446	0.08558	1	4/110/1471	0.07168	0.2742
p21.32	rs4713521	6	32366007	C6orf10			A	G	3/134/1441	0.08478	1	4/111/1457	0.07283	0.2794
p21.32	rs9380292	6	32382845		C6orf10	HCG23	G	A	23/332/1230	0.21	0.9047	42/409/1134	0.2627	0.5028
p21.32	rs9380293	6	32409507		BTNL2	HLA-DRA	A	G	108/571/906	0.3733	0.1781	133/627/825	0.4047	0.3848
p21.32	rs9391860	6	32411793		BTNL2	HLA-DRA	A	G	23/334/1229	0.2109	0.9055	42/405/1137	0.2611	0.3879
p21.32	rs3135356	6	32423739		BTNL2	HLA-DRA	A	G	43/405/1125	0.2634	0.3884	47/340/1174	0.2394	0.00066
p21.32	rs3135351	6	32425168		BTNL2	HLA-DRA	A	C	43/407/1135	0.2627	0.3889	49/346/1188	0.2411	0.0003637
p21.32	rs2395170	6	32426536		BTNL2	HLA-DRA	C	A	50/458/1075	0.2904	0.8628	61/404/1119	0.2769	0.002614
p21.32	rs2395171	6	32426760		BTNL2	HLA-DRA	A	G	50/457/1079	0.2895	0.8622	60/402/1123	0.2751	0.00251
p21.32	rs61341125	6	32431356		BTNL2	HLA-DRA	A	G	40/389/1155	0.2523	0.3184	45/333/1207	0.2313	0.0006698
p21.32	rs3129867	6	32436443		BTNL2	HLA-DRA	G	C	100/610/873	0.3808	0.692	126/633/826	0.4025	0.7552
p21.32	rs9405035	6	32439291		BTNL2	HLA-DRA	A	G	36/402/1148	0.2542	0.9212	54/472/1058	0.2991	0.8667
p21.32	rs3135393	6	32441065	HLA-DRA			G	A	44/414/1128	0.2664	0.3976	50/346/1189	0.2418	0.0002425
p21.32	rs3129882	6	32441753	HLA-DRA			A	G	135/626/825	0.4054	0.2927	115/587/883	0.3826	0.2121
p21.32	rs9268657	6	32441879	HLA-DRA			A	G	406/791/388	0.4999	0.9599	409/783/393	0.4999	0.6512
p21.32	rs16822599	6	32441885	HLA-DRA			T	A	40/388/1157	0.2517	0.2725	45/333/1207	0.2313	0.0006698
p21.32	rs16822599	6	32441885	HLA-DRA			T	A	40/388/1157	0.2517	0.2725	45/333/1207	0.2313	0.0006698
p21.32	rs16822660	6	32445783		HLA-DRA	HLA-DRB9	G	A	46/411/1129	0.2669	0.2583	48/357/1180	0.245	0.001999
p21.32	rs6937545	6	32450254		HLA-DRA	HLA-DRB9	A	C	50/499/1036	0.3065	0.325	56/557/971	0.3332	0.02866
p21.32	rs7754768	6	32452402		HLA-DRA	HLA-DRB9	A	G	407/805/372	0.4998	0.5137	389/782/412	0.4999	0.6509
p21.32	rs7763262	6	32457105		HLA-DRA	HLA-DRB9	A	G	50/500/1036	0.3068	0.2881	57/557/971	0.3337	0.03526
p21.32	rs7743662	6	32457272		HLA-DRA	HLA-DRB9	A	G	351/783/450	0.498	0.7623	347/785/453	0.4978	0.8401
p21.32	rs9268830	6	32459795		HLA-DRA	HLA-DRB9	G	C	197/696/692	0.4512	0.2903	244/712/627	0.4707	0.07812
p21.32	rs9268832	6	32460012	HLA-DRB9			G	A	388/804/393	0.5	0.5808	373/761/450	0.4988	0.1442
p21.32	rs59406271	6	32463955	HLA-DRB9			G	A	46/402/1129	0.2642	0.1812	56/350/1170	0.2502	2.916e-05
p21.32	rs59406271	6	32463955	HLA-DRB9			G	A	46/402/1129	0.2642	0.1812	56/350/1170	0.2502	2.916e-05
p21.32	rs9268909	6	32464563	HLA-DRB9			G	A	23/327/1235	0.2076	0.8085	47/406/1132	0.2657	0.156
p21.32	rs9268927	6	32465308	HLA-DRB9			A	T	30/401/1152	0.2488	0.5443	32/379/1171	0.2408	0.8345
p21.32	rs9268978	6	32467201	HLA-DRB9			A	G	30/404/1151	0.2499	0.4819	32/404/1149	0.2517	0.6898
p21.32	rs9286789	6	32471919	HLA-DRB9			C	A	53/433/1094	0.283	0.2132	60/373/1144	0.2638	8.269e-05
p21.32	rs9286789	6	32471919	HLA-DRB9			C	A	53/433/1094	0.283	0.2132	60/373/1144	0.2638	8.269e-05
p21.32	rs9461755	6	32473269	HLA-DRB9			A	G	53/435/1098	0.2829	0.2149	61/374/1149	0.2641	5.618e-05
p21.32	rs9461756	6	32473352	HLA-DRB9			A	G	53/432/1098	0.2821	0.2116	61/371/1150	0.2631	3.541e-05
p21.32	rs17209754	6	32474926		HLA-DRB9	HLA-DRB5	A	G	53/433/1098	0.2824	0.2124	61/371/1150	0.2631	3.541e-05
p21.32	rs9469133	6	32479304		HLA-DRB9	HLA-DRB5	G	C	53/429/1095	0.2817	0.1796	61/366/1144	0.2624	2.904e-05
p21.32	rs9469134	6	32479342		HLA-DRB9	HLA-DRB5	A	G	53/412/1059	0.2821	0.1025	61/359/1106	0.2655	2.764e-05
p21.32	rs12204922	6	32483836		HLA-DRB9	HLA-DRB5	C	A	30/375/1174	0.2375	1	26/377/1176	0.2348	0.5916
p21.32	rs117898110	6	32535973		HLA-DRB5	RNU1-61P	A	G	30/316/1223	0.2109	0.07321	32/331/1197	0.2211	0.1092
p21.32	rs73727980	6	32543997		HLA-DRB5	RNU1-61P	G	A	261/744/577	0.4801	0.4321	310/695/577	0.4858	0.0001559
p21.32	rs9269749	6	32580359	HLA-DRB1			C	A	265/786/534	0.4856	0.4084	313/742/529	0.4907	0.07311
p21.32	rs34350244	6	32593688		HLA-DRB1	HLA-DQA1	A	G	13/274/1299	0.1713	0.8832	13/228/1344	0.1474	0.3077
p21.32	rs9270614	6	32597338		HLA-DRB1	HLA-DQA1	A	C	281/795/503	0.4901	0.3044	317/747/515	0.4921	0.1251
p21.32	rs11757382	6	32601860		HLA-DRB1	HLA-DQA1	C	A	141/709/736	0.4296	0.1146	214/660/711	0.4508	0.002604
p21.32	rs9270827	6	32602355		HLA-DRB1	HLA-DQA1	C	A	130/623/832	0.4019	0.3818	151/661/769	0.4236	0.5936
p21.32	rs9270852	6	32603020		HLA-DRB1	HLA-DQA1	G	A	130/623/833	0.4018	0.3816	151/663/769	0.4238	0.6355
p21.32	rs13215135	6	32605248		HLA-DRB1	HLA-DQA1	G	A	5/320/1258	0.1867	0.0003826	28/379/1170	0.2378	0.7509
p21.32	rs9270970	6	32605797		HLA-DRB1	HLA-DQA1	G	A	129/624/832	0.4016	0.4528	151/664/770	0.4237	0.6781
p21.32	rs9270984	6	32606214		HLA-DRB1	HLA-DQA1	A	C	128/604/830	0.399	0.2282	141/652/775	0.4183	0.8093
p21.32	rs2858867	6	32607548		HLA-DRB1	HLA-DQA1	A	G	347/791/447	0.498	0.9598	306/780/499	0.4926	0.9594
p21.32	rs9271096	6	32608649		HLA-DRB1	HLA-DQA1	A	G	129/623/833	0.4014	0.416	151/664/770	0.4237	0.6781
p21.32	rs9271100	6	32608701		HLA-DRB1	HLA-DQA1	A	G	129/623/833	0.4014	0.416	151/664/770	0.4237	0.6781
p21.32	rs660895	6	32609603		HLA-DRB1	HLA-DQA1	G	A	120/603/863	0.3903	0.3036	118/550/917	0.3729	0.006956
p21.32	rs9271149	6	32609678		HLA-DRB1	HLA-DQA1	A	G	129/623/833	0.4014	0.416	151/664/769	0.4239	0.6782
p21.32	rs9271170	6	32610112		HLA-DRB1	HLA-DQA1	A	G	129/623/830	0.4018	0.4167	151/664/769	0.4239	0.6782
p21.32	rs9271178	6	32610414		HLA-DRB1	HLA-DQA1	G	A	129/623/833	0.4014	0.416	151/664/769	0.4239	0.6782
p21.32	rs9271192	6	32610753		HLA-DRB1	HLA-DQA1	C	A	130/621/833	0.4015	0.3481	151/663/769	0.4238	0.6355
p21.32	rs5021728	6	32610876		HLA-DRB1	HLA-DQA1	G	A	176/691/717	0.4417	0.649	210/719/656	0.4604	0.5489
p21.32	rs502055	6	32611226		HLA-DRB1	HLA-DQA1	G	A	176/690/719	0.4413	0.6084	210/717/656	0.4603	0.548
p21.32	rs3997871	6	32612679		HLA-DRB1	HLA-DQA1	G	A	130/623/832	0.4019	0.3818	150/664/770	0.4234	0.6783
p21.32	rs521539	6	32614196		HLA-DRB1	HLA-DQA1	A	G	119/604/860	0.3904	0.3676	118/550/916	0.3731	0.006966
p21.32	rs3104413	6	32614873		HLA-DRB1	HLA-DQA1	G	C	13/273/1300	0.1708	0.8831	13/228/1344	0.1474	0.3077
p21.32	rs6931277	6	32615580		HLA-DRB1	HLA-DQA1	A	T	13/273/1298	0.1709	0.8831	13/228/1342	0.1476	0.3082
p21.32	rs9271348	6	32615965		HLA-DRB1	HLA-DQA1	G	A	148/657/780	0.4205	0.5908	116/610/859	0.3901	0.6064
p21.32	rs113488265	6	32619061		HLA-DRB1	HLA-DQA1	G	A	9/188/1389	0.1215	0.3025	8/248/1329	0.1527	0.4105
p21.32	rs9271366	6	32619077		HLA-DRB1	HLA-DQA1	G	A	75/518/991	0.3328	0.4968	84/517/984	0.3388	0.1384
p21.32	rs28669773	6	32621318		HLA-DRB1	HLA-DQA1	G	A	5/327/1252	0.1901	0.0001792	28/381/1175	0.2378	0.7511
p21.32	rs9271492	6	32621345		HLA-DRB1	HLA-DQA1	C	A	108/620/857	0.3883	0.7962	115/636/834	0.3971	0.7046
p21.32	rs35407883	6	32622752		HLA-DRB1	HLA-DQA1	G	A	5/327/1253	0.19	0.0001795	28/381/1176	0.2377	0.7511
p21.32	rs17533090	6	32622945		HLA-DRB1	HLA-DQA1	A	C	6/332/1248	0.1934	0.000389	30/394/1161	0.2454	0.6824
p21.32	rs9271586	6	32623122		HLA-DRB1	HLA-DQA1	A	C	243/768/575	0.4781	0.6365	245/770/570	0.479	0.6
p21.32	rs9271588	6	32623176		HLA-DRB1	HLA-DQA1	G	A	243/767/575	0.4781	0.6742	245/770/570	0.479	0.6
p21.32	rs35399661	6	32623213		HLA-DRB1	HLA-DQA1	G	A	6/332/1248	0.1934	0.000389	30/394/1159	0.2457	0.6824
p21.32	rs4959030	6	32623974		HLA-DRB1	HLA-DQA1	A	G	6/281/1293	0.1682	0.02358	18/256/1306	0.1677	0.1762
p21.32	rs9271640	6	32624423		HLA-DRB1	HLA-DQA1	A	G	320/772/477	0.495	0.8383	356/766/437	0.4987	0.5764
p21.32	rs146669851	6	32624448		HLA-DRB1	HLA-DQA1	G	A	30/359/1195	0.2295	0.585	46/319/1215	0.2263	5.267e-05
p21.32	rs28421666	6	32624960		HLA-DRB1	HLA-DQA1	G	A	30/368/1188	0.2334	0.8294	50/323/1212	0.2313	1.015e-05
p21.32	rs9271720	6	32625730		HLA-DRB1	HLA-DQA1	A	G	111/605/853	0.3882	0.7948	117/645/815	0.402	0.5311
p21.32	rs9271842	6	32627176		HLA-DRB1	HLA-DQA1	A	C	111/619/855	0.3898	1	117/647/821	0.4014	0.5315
p21.32	rs28720766	6	32627286		HLA-DRB1	HLA-DQA1	A	G	30/368/1188	0.2334	0.8294	50/323/1212	0.2313	1.015e-05
p21.32	rs3129768	6	32627306		HLA-DRB1	HLA-DQA1	C	A	324/771/490	0.4945	0.5095	358/767/460	0.4979	0.2672
p21.32	rs9271857	6	32627370		HLA-DRB1	HLA-DQA1	A	G	111/612/854	0.389	0.9484	117/645/819	0.4014	0.5727
p21.32	rs77029856	6	32627928		HLA-DRB1	HLA-DQA1	G	A	6/332/1247	0.1935	0.0003887	30/392/1158	0.2452	0.6825
p21.32	rs116573360	6	32630589	HLA-DQA1			G	A	14/370/1188	0.2211	0.008639	24/326/1211	0.2109	0.7183
p21.32	rs114308959	6	32631668	HLA-DQA1			G	A	30/367/1188	0.2331	0.7472	50/323/1212	0.2313	1.015e-05
p21.32	rs115738641	6	32632203	HLA-DQA1			G	A	30/368/1186	0.2337	0.8295	50/323/1212	0.2313	1.015e-05
p21.32	rs9272105	6	32632222	HLA-DQA1			A	G	246/777/550	0.4813	0.3196	270/764/545	0.4848	0.9586
p21.32	rs3104376	6	32632226	HLA-DQA1			A	G	172/667/745	0.4346	0.2246	177/720/688	0.448	0.6139
p21.32	rs116728358	6	32632285	HLA-DQA1			G	A	30/367/1188	0.2331	0.7472	50/323/1212	0.2313	1.015e-05
p21.32	rs9272114	6	32632540	HLA-DQA1			G	A	245/776/563	0.4798	0.4322	270/762/550	0.4843	0.8355
p21.32	rs3104373	6	32632598	HLA-DQA1			A	G	6/282/1293	0.1687	0.02379	18/259/1303	0.1693	0.2318
p21.32	rs9272116	6	32632627	HLA-DQA1			G	A	235/772/561	0.4784	0.2676	257/761/547	0.4828	0.7937
p21.32	rs116485389	6	32632680	HLA-DQA1			G	A	30/368/1187	0.2336	0.8295	50/322/1211	0.231	9.676e-06
p21.32	rs79473311	6	32633605	HLA-DQA1			C	G	33/363/1184	0.2347	0.3916	51/318/1209	0.2307	3.051e-06
p21.32	rs115711192	6	32634384	HLA-DQA1			A	G	30/368/1188	0.2334	0.8294	50/323/1212	0.2313	1.015e-05
p21.32	rs9272218	6	32634461	HLA-DQA1			A	G	246/777/560	0.4803	0.4026	270/764/550	0.4844	0.8764
p21.32	rs9272219	6	32634492	HLA-DQA1			A	C	101/605/880	0.3794	0.8947	99/531/955	0.3542	0.03328
p21.32	rs28635391	6	32635271	HLA-DQA1			A	G	30/368/1188	0.2334	0.8294	50/321/1212	0.2306	9.212e-06
p21.32	rs199950886	6	32635298	HLA-DQA1			C	A	30/368/1188	0.2334	0.8294	50/323/1211	0.2314	1.023e-05
p21.32	rs115493697	6	32635582	HLA-DQA1			A	G	30/359/1168	0.2329	0.6639	48/314/1180	0.2305	1.996e-05
p21.32	rs115872586	6	32637156	HLA-DQA1			A	G	30/368/1188	0.2334	0.8294	50/323/1212	0.2313	1.015e-05
p21.32	rs12722039	6	32637507	HLA-DQA1			A	G	5/319/1212	0.1913	0.0002553	28/375/1110	0.2443	0.6734
p21.32	rs9272577	6	32639548	HLA-DQA1			A	G	101/605/880	0.3794	0.8947	99/531/953	0.3545	0.03346
p21.32	rs114612036	6	32639573	HLA-DQA1			G	A	28/365/1181	0.2317	1	50/315/1208	0.229	4.243e-06
p21.32	rs74395243	6	32640339	HLA-DQA1			A	G	30/368/1183	0.2341	0.8297	50/323/1209	0.2316	1.041e-05
p21.32	rs74395243	6	32640339	HLA-DQA1			A	G	30/368/1183	0.2341	0.8297	50/323/1209	0.2316	1.041e-05
p21.32	rs9272630	6	32640373	HLA-DQA1			A	G	101/605/880	0.3794	0.8947	99/531/955	0.3542	0.03328
p21.32	rs115805770	6	32640655	HLA-DQA1			A	G	30/364/1187	0.2322	0.7449	50/321/1210	0.2308	9.299e-06
p21.32	rs9272657	6	32640878	HLA-DQA1			A	G	101/605/879	0.3795	0.8429	98/531/954	0.3538	0.03949
p21.32	rs1048023	6	32641373	HLA-DQA1			G	C	61/448/1023	0.3028	0.1773	72/464/1009	0.3161	0.05321
p21.32	rs146420652	6	32641804	HLA-DQA1			A	G	30/363/1188	0.2318	0.6655	50/322/1212	0.2309	9.614e-06
p21.32	rs1048134	6	32642012	HLA-DQA1			G	A	30/367/1189	0.233	0.7471	50/323/1212	0.2313	1.015e-05
p21.32	rs9273012	6	32643864	HLA-DQA1			G	A	101/605/880	0.3794	0.8947	99/531/955	0.3542	0.03328
p21.32	rs7744020	6	32658353		HLA-DQA1	HLA-DQB1	A	G	132/589/858	0.3943	0.03504	97/519/967	0.349	0.01739
p21.32	rs4713573	6	32659207		HLA-DQA1	HLA-DQB1	C	A	49/473/1061	0.2957	0.7339	49/443/1091	0.2834	0.5955
p21.32	rs9273489	6	32660412	HLA-DQB1			G	A	13/265/1308	0.1666	1	14/232/1339	0.1506	0.2443
p21.32	rs3210168	6	32661369	HLA-DQB1			A	G	277/704/544	0.4847	0.06449	255/713/580	0.478	0.1514
p21.32	rs35915063	6	32665742	HLA-DQB1			G	A	65/505/1014	0.3205	0.8143	67/445/1071	0.2989	0.0228
p21.32	rs9274685	6	32669067		HLA-DQB1	MTCO3P1	A	G	307/748/510	0.4916	0.2802	390/759/414	0.4999	0.2657
p21.32	rs17205528	6	32669381		HLA-DQB1	MTCO3P1	A	G	172/708/706	0.4433	0.8208	167/636/782	0.4247	0.02866
p21.32	rs9274717	6	32669677		HLA-DQB1	MTCO3P1	C	A	307/767/512	0.4916	0.5072	390/773/421	0.4998	0.3655
p21.32	rs2858303	6	32682773		HLA-DQB1	MTCO3P1	G	A	44/380/1158	0.2521	0.07174	26/301/1251	0.1987	0.1268
p21.32	rs9275133	6	32682811		HLA-DQB1	MTCO3P1	A	G	105/620/855	0.3873	0.6494	103/567/910	0.3696	0.2475
p21.32	rs9275136	6	32682980		HLA-DQB1	MTCO3P1	G	A	105/618/852	0.3875	0.6493	103/565/901	0.3707	0.2756
p21.32	rs17212090	6	32683032		HLA-DQB1	MTCO3P1	A	G	390/796/398	0.5	0.8802	328/734/520	0.4926	0.02162
p21.32	rs9275141	6	32683340		HLA-DQB1	MTCO3P1	A	C	105/620/860	0.3865	0.6966	103/567/915	0.3688	0.2467
p21.32	rs17205851	6	32683488		HLA-DQB1	MTCO3P1	G	A	391/796/399	0.5	0.92	328/734/522	0.4925	0.01895
p21.32	rs28746936	6	32683616		HLA-DQB1	MTCO3P1	A	G	390/748/376	0.5	0.6439	324/702/522	0.4918	0.002286
p21.32	rs17212223	6	32683763		HLA-DQB1	MTCO3P1	A	G	65/500/1007	0.3205	0.7532	67/439/1070	0.2975	0.01383
p21.32	rs17212279	6	32683936		HLA-DQB1	MTCO3P1	G	A	388/795/399	0.5	0.8801	329/734/515	0.4931	0.02471
p21.32	rs1694114	6	32684201		HLA-DQB1	MTCO3P1	G	A	329/795/458	0.4967	0.6491	273/711/599	0.4788	0.01366
p21.32	rs9275152	6	32684419		HLA-DQB1	MTCO3P1	G	A	3/145/1437	0.09073	1	6/115/1463	0.07696	0.03706
p21.32	rs17206035	6	32684447		HLA-DQB1	MTCO3P1	G	A	390/792/403	0.5	1	331/732/521	0.4928	0.01435
p21.32	rs3021058	6	32684582		HLA-DQB1	MTCO3P1	A	C	107/618/860	0.3872	0.8456	103/567/915	0.3688	0.2467
p21.32	rs3021057	6	32684586		HLA-DQB1	MTCO3P1	G	A	107/617/862	0.3867	0.8457	103/567/915	0.3688	0.2467
p21.32	rs28746953	6	32685046		HLA-DQB1	MTCO3P1	G	A	391/792/403	0.5	0.96	331/732/522	0.4927	0.01252
p21.32	rs28746967	6	32685454		HLA-DQB1	MTCO3P1	G	A	390/792/403	0.5	1	331/732/522	0.4927	0.01252
p21.32	rs28747019	6	32686980		HLA-DQB1	MTCO3P1	A	C	390/777/377	0.5	0.8386	315/724/519	0.4914	0.03448
p21.32	rs113201741	6	32689450		HLA-DQB1	MTCO3P1	G	A	22/343/1202	0.2165	0.7271	30/287/1241	0.1979	0.009788
p21.32	rs9275206	6	32689788		HLA-DQB1	MTCO3P1	G	A	0/145/1435	0.08756	0.07443	2/114/1464	0.07189	1
p21.32	rs73405373	6	32690332		HLA-DQB1	MTCO3P1	A	G	29/345/1212	0.2218	0.4283	41/291/1253	0.2076	1.757e-05
p21.32	rs9469220	6	32690533		HLA-DQB1	MTCO3P1	G	A	175/668/740	0.4363	0.2049	146/601/834	0.4053	0.01541
p21.32	rs113542246	6	32690707		HLA-DQB1	MTCO3P1	C	A	29/344/1206	0.2222	0.428	40/285/1250	0.2049	1.97e-05
p21.32	rs111413563	6	32690716		HLA-DQB1	MTCO3P1	T	A	28/331/1202	0.2172	0.3506	38/276/1248	0.2	2.113e-05
p21.32	rs34723256	6	32690917		HLA-DQB1	MTCO3P1	A	T	22/318/1181	0.2097	0.9026	26/313/1188	0.2105	0.3293
p21.32	rs17581061	6	32691221		HLA-DQB1	MTCO3P1	G	A	27/335/1210	0.2168	0.4851	37/284/1251	0.2018	0.000135
p21.32	rs112919014	6	32691278		HLA-DQB1	MTCO3P1	G	C	29/344/1207	0.2221	0.4278	41/288/1246	0.2073	1.461e-05
p21.32	rs9275221	6	32691322		HLA-DQB1	MTCO3P1	G	A	1/144/1417	0.0891	0.2535	3/117/1439	0.07578	0.731
p21.32	rs114872374	6	32691435		HLA-DQB1	MTCO3P1	G	A	16/337/1205	0.2088	0.1817	26/284/1242	0.1931	0.04742
p21.32	rs149183964	6	32691763		HLA-DQB1	MTCO3P1	G	A	28/343/1212	0.2203	0.4941	39/286/1253	0.2041	3.57e-05
p21.32	rs35472814	6	32692120		HLA-DQB1	MTCO3P1	G	A	22/323/1239	0.2049	0.8068	26/323/1234	0.2088	0.3371
p21.32	rs112918734	6	32692190		HLA-DQB1	MTCO3P1	A	G	29/345/1212	0.2218	0.4283	41/291/1253	0.2076	1.757e-05
p21.32	rs28371267	6	32695801		HLA-DQB1	MTCO3P1	A	G	45/383/1158	0.2538	0.05958	26/307/1252	0.2008	0.1675
p21.32	rs17427445	6	32695987		HLA-DQB1	MTCO3P1	A	G	22/323/1239	0.2049	0.8068	27/323/1235	0.2096	0.2797
p21.32	rs112044727	6	32696004		HLA-DQB1	MTCO3P1	C	A	29/345/1212	0.2218	0.4283	41/291/1252	0.2078	1.777e-05
p21.32	rs112745211	6	32696139		HLA-DQB1	MTCO3P1	G	A	29/345/1212	0.2218	0.4283	41/291/1253	0.2076	1.757e-05
p21.32	rs112745211	6	32696139		HLA-DQB1	MTCO3P1	G	A	29/345/1212	0.2218	0.4283	41/291/1253	0.2076	1.757e-05
p21.32	rs34677551	6	32696159		HLA-DQB1	MTCO3P1	C	A	22/322/1240	0.2044	0.8059	27/323/1235	0.2096	0.2797
p21.32	rs35239297	6	32696183		HLA-DQB1	MTCO3P1	A	G	22/323/1241	0.2046	0.8066	27/322/1235	0.2092	0.2783
p21.32	rs35900855	6	32696261		HLA-DQB1	MTCO3P1	G	A	22/323/1241	0.2046	0.8066	27/323/1235	0.2096	0.2797
p21.32	rs112205942	6	32696281		HLA-DQB1	MTCO3P1	G	A	29/345/1210	0.2221	0.4288	41/291/1252	0.2078	1.777e-05
p21.32	rs2647015	6	32696316		HLA-DQB1	MTCO3P1	C	A	45/383/1158	0.2538	0.05958	26/307/1251	0.201	0.1677
p21.32	rs9275300	6	32696349		HLA-DQB1	MTCO3P1	G	A	2/147/1434	0.09084	0.5781	5/116/1462	0.07643	0.099
p21.32	rs9275300	6	32696349		HLA-DQB1	MTCO3P1	G	A	2/147/1434	0.09084	0.5781	5/116/1462	0.07643	0.099
p21.32	rs115255544	6	32696851		HLA-DQB1	MTCO3P1	G	A	22/323/1239	0.2049	0.8068	27/323/1233	0.2098	0.2801
p21.32	rs75786451	6	32696869		HLA-DQB1	MTCO3P1	G	A	29/345/1212	0.2218	0.4283	41/291/1253	0.2076	1.757e-05
p21.32	rs75786451	6	32696869		HLA-DQB1	MTCO3P1	G	A	29/345/1212	0.2218	0.4283	41/291/1253	0.2076	1.757e-05
p21.32	rs75444829	6	32696906		HLA-DQB1	MTCO3P1	A	G	29/345/1211	0.2219	0.4286	41/291/1253	0.2076	1.757e-05
p21.32	rs76175267	6	32696927		HLA-DQB1	MTCO3P1	A	G	29/345/1212	0.2218	0.4283	41/291/1253	0.2076	1.757e-05
p21.32	rs115785636	6	32696998		HLA-DQB1	MTCO3P1	C	G	22/323/1238	0.205	0.8069	27/317/1233	0.2076	0.2237
p21.32	rs116303320	6	32697014		HLA-DQB1	MTCO3P1	A	G	22/323/1241	0.2046	0.8066	27/323/1235	0.2096	0.2797
p21.32	rs9275307	6	32697213		HLA-DQB1	MTCO3P1	A	T	3/147/1435	0.09187	1	5/116/1462	0.07643	0.099
p21.32	rs112767544	6	32697323		HLA-DQB1	MTCO3P1	A	C	28/339/1186	0.222	0.4931	40/288/1225	0.2089	4.433e-05
p21.32	rs140055405	6	32697359		HLA-DQB1	MTCO3P1	C	A	29/345/1212	0.2218	0.4283	41/290/1252	0.2074	1.624e-05
p21.32	rs112495399	6	32697378		HLA-DQB1	MTCO3P1	G	A	27/345/1212	0.2202	0.6482	41/289/1252	0.207	1.494e-05
p21.32	rs112394065	6	32697557		HLA-DQB1	MTCO3P1	G	A	29/345/1210	0.2221	0.4288	41/290/1251	0.2075	1.641e-05
p21.32	rs10484561	6	32697643		HLA-DQB1	MTCO3P1	C	A	21/321/1238	0.2034	1	27/322/1230	0.2098	0.2791
p21.32	rs113853932	6	32697654		HLA-DQB1	MTCO3P1	G	A	29/345/1210	0.2221	0.4288	41/290/1252	0.2074	1.624e-05
p21.32	rs113853932	6	32697654		HLA-DQB1	MTCO3P1	G	A	29/345/1210	0.2221	0.4288	41/290/1252	0.2074	1.624e-05
p21.32	rs17206196	6	32697852		HLA-DQB1	MTCO3P1	A	C	22/323/1241	0.2046	0.8066	27/323/1235	0.2096	0.2797
p21.32	rs111258791	6	32697918		HLA-DQB1	MTCO3P1	A	G	29/345/1212	0.2218	0.4283	41/291/1252	0.2078	1.777e-05
p21.32	rs9275312	6	32697951		HLA-DQB1	MTCO3P1	G	A	81/532/973	0.3418	0.4626	81/471/1033	0.3196	0.005895
p21.32	rs17212574	6	32697973		HLA-DQB1	MTCO3P1	A	G	22/323/1239	0.2049	0.8068	27/323/1232	0.2099	0.2803
p21.32	rs78043146	6	32698049		HLA-DQB1	MTCO3P1	C	A	23/323/1239	0.2057	0.7137	27/325/1233	0.2105	0.2839
p21.32	rs9275319	6	32698518		HLA-DQB1	MTCO3P1	G	A	13/265/1308	0.1666	1	14/232/1339	0.1506	0.2443
p21.32	rs9275324	6	32698858		HLA-DQB1	MTCO3P1	A	G	3/144/1434	0.09038	1	5/116/1463	0.07638	0.0988
p21.32	rs9275326	6	32698883		HLA-DQB1	MTCO3P1	A	G	3/147/1436	0.09182	1	5/116/1464	0.07634	0.09859
p21.32	rs35678932	6	32699086		HLA-DQB1	MTCO3P1	A	C	22/323/1240	0.2047	0.8067	27/323/1232	0.2099	0.2803
p21.32	rs9275330	6	32699098		HLA-DQB1	MTCO3P1	G	A	77/532/972	0.3398	0.7113	77/470/1033	0.3169	0.01703
p21.32	rs9275331	6	32699122		HLA-DQB1	MTCO3P1	G	A	81/532/973	0.3418	0.4626	81/471/1033	0.3196	0.005895
p21.32	rs17427564	6	32699290		HLA-DQB1	MTCO3P1	G	A	22/323/1239	0.2049	0.8068	27/323/1235	0.2096	0.2797
p21.32	rs9275334	6	32699330		HLA-DQB1	MTCO3P1	G	A	3/147/1429	0.0922	1	5/115/1460	0.07598	0.09448
p21.32	rs9275338	6	32699566		HLA-DQB1	MTCO3P1	T	A	81/532/973	0.3418	0.4626	81/470/1033	0.3194	0.005782
p21.32	rs9275358	6	32700118		HLA-DQB1	MTCO3P1	G	C	81/532/972	0.342	0.4627	81/470/1032	0.3195	0.005803
p21.32	rs115135952	6	32700444		HLA-DQB1	MTCO3P1	C	A	29/345/1212	0.2218	0.4283	41/290/1253	0.2073	1.607e-05
p21.32	rs112230901	6	32700706		HLA-DQB1	MTCO3P1	G	A	29/345/1212	0.2218	0.4283	41/291/1253	0.2076	1.757e-05
p21.32	rs113467005	6	32700922		HLA-DQB1	MTCO3P1	A	T	29/337/1208	0.2195	0.357	41/285/1251	0.2056	1.178e-05
p21.32	rs112679091	6	32701180		HLA-DQB1	MTCO3P1	A	G	29/345/1211	0.2219	0.4286	41/291/1253	0.2076	1.757e-05
p21.32	rs113919826	6	32701408		HLA-DQB1	MTCO3P1	A	G	29/344/1211	0.2216	0.4269	41/291/1253	0.2076	1.757e-05
p21.32	rs9275394	6	32701677		HLA-DQB1	MTCO3P1	C	A	2/146/1429	0.09059	0.5776	3/115/1460	0.07374	0.4986
p21.32	rs9275395	6	32701706		HLA-DQB1	MTCO3P1	G	A	3/147/1435	0.09187	1	5/116/1463	0.07638	0.0988
p21.32	rs76901383	6	32702040		HLA-DQB1	MTCO3P1	G	A	48/408/1128	0.2676	0.1336	48/413/1121	0.27	0.1921
p21.32	rs2858308	6	32702223		HLA-DQB1	MTCO3P1	A	C	43/384/1158	0.2526	0.111	26/306/1253	0.2004	0.1661
p21.32	rs112678772	6	32702512		HLA-DQB1	MTCO3P1	A	T	29/343/1206	0.2218	0.4264	41/291/1252	0.2078	1.777e-05
p21.32	rs117736824	6	32702557		HLA-DQB1	MTCO3P1	A	G	29/340/1217	0.2195	0.3594	40/292/1253	0.2072	4.611e-05
p21.32	rs35406540	6	32702591		HLA-DQB1	MTCO3P1	G	A	48/409/1127	0.268	0.1589	49/413/1120	0.2708	0.1631
p21.32	rs35406540	6	32702591		HLA-DQB1	MTCO3P1	G	A	48/409/1127	0.268	0.1589	49/413/1120	0.2708	0.1631
p21.32	rs66709408	6	32702637		HLA-DQB1	MTCO3P1	A	G	48/404/1103	0.2698	0.1578	49/412/1102	0.2731	0.1654
p21.32	rs113738873	6	32702741		HLA-DQB1	MTCO3P1	G	A	29/345/1211	0.2219	0.4286	41/291/1253	0.2076	1.757e-05
p21.32	rs113738873	6	32702741		HLA-DQB1	MTCO3P1	G	A	29/345/1211	0.2219	0.4286	41/291/1253	0.2076	1.757e-05
p21.32	rs34492195	6	32703056		HLA-DQB1	MTCO3P1	A	G	22/323/1240	0.2047	0.8067	27/323/1234	0.2097	0.2799
p21.32	rs112947282	6	32703077		HLA-DQB1	MTCO3P1	A	G	29/344/1203	0.2225	0.4287	41/291/1251	0.2079	1.797e-05
p21.32	rs2856705	6	32703179		HLA-DQB1	MTCO3P1	A	G	43/384/1158	0.2526	0.111	26/306/1253	0.2004	0.1661
p21.32	rs13192471	6	32703326		HLA-DQB1	MTCO3P1	G	A	47/409/1126	0.2674	0.188	49/412/1123	0.2701	0.1371
p21.32	rs9275434	6	32703470		HLA-DQB1	MTCO3P1	A	G	3/144/1430	0.09059	1	5/111/1455	0.07405	0.07725
p21.32	rs9275437	6	32703635		HLA-DQB1	MTCO3P1	A	G	3/145/1430	0.09111	1	5/116/1458	0.07661	0.09982
p21.32	rs9275442	6	32703978		HLA-DQB1	MTCO3P1	A	G	3/147/1431	0.09209	1	5/116/1461	0.07647	0.0992
p21.32	rs17499655	6	32704358		HLA-DQB1	MTCO3P1	A	G	48/409/1128	0.2679	0.1588	49/413/1123	0.2704	0.1628
p21.32	rs112214454	6	32705792		HLA-DQB1	MTCO3P1	G	A	46/401/1125	0.2644	0.1809	45/400/1113	0.265	0.2142
p21.32	rs112802378	6	32707581		MTCO3P1	XXbac-BPG254F23.7	A	G	29/345/1212	0.2218	0.4283	41/291/1253	0.2076	1.757e-05
p21.32	rs9275530	6	32707746		MTCO3P1	XXbac-BPG254F23.7	C	G	3/147/1436	0.09182	1	5/116/1464	0.07634	0.09859
p21.32	rs9275532	6	32707857		MTCO3P1	XXbac-BPG254F23.7	G	C	3/146/1436	0.0913	1	5/116/1464	0.07634	0.09859
p21.32	rs114931041	6	32709381		MTCO3P1	XXbac-BPG254F23.7	C	A	29/342/1211	0.2209	0.4245	41/290/1253	0.2073	1.607e-05
p21.32	rs112057165	6	32710045		MTCO3P1	XXbac-BPG254F23.7	G	A	29/345/1212	0.2218	0.4283	41/291/1252	0.2078	1.777e-05
p21.32	rs113556552	6	32710287		MTCO3P1	XXbac-BPG254F23.7	A	G	29/345/1211	0.2219	0.4286	41/291/1253	0.2076	1.757e-05
p21.32	rs113556552	6	32710287		MTCO3P1	XXbac-BPG254F23.7	A	G	29/345/1211	0.2219	0.4286	41/291/1253	0.2076	1.757e-05
p21.32	rs112116290	6	32712235		MTCO3P1	XXbac-BPG254F23.7	C	G	29/345/1212	0.2218	0.4283	41/290/1253	0.2073	1.607e-05
p21.32	rs111670117	6	32712376		MTCO3P1	XXbac-BPG254F23.7	G	A	27/334/1197	0.218	0.4863	38/284/1241	0.2038	8.907e-05
p21.32	rs111723134	6	32712490		MTCO3P1	XXbac-BPG254F23.7	A	T	29/341/1202	0.2216	0.4246	41/288/1238	0.2082	1.582e-05
p21.32	rs111723134	6	32712490		MTCO3P1	XXbac-BPG254F23.7	A	T	29/341/1202	0.2216	0.4246	41/288/1238	0.2082	1.582e-05
p21.32	rs9275592	6	32712843		MTCO3P1	XXbac-BPG254F23.7	A	C	3/147/1435	0.09187	1	5/116/1463	0.07638	0.0988
p21.32	rs73396625	6	32713531		MTCO3P1	XXbac-BPG254F23.7	G	A	29/344/1213	0.2213	0.4266	41/291/1253	0.2076	1.757e-05
p21.32	rs7454108	6	32713706		MTCO3P1	XXbac-BPG254F23.7	G	A	3/147/1436	0.09182	1	5/116/1462	0.07643	0.099
p21.32	rs3957146	6	32713753		MTCO3P1	XXbac-BPG254F23.7	G	A	3/147/1436	0.09182	1	5/116/1464	0.07634	0.09859
p21.32	rs3998159	6	32714242		MTCO3P1	XXbac-BPG254F23.7	C	A	3/147/1435	0.09187	1	5/117/1462	0.07696	0.1041
p21.32	rs3957148	6	32714360		MTCO3P1	XXbac-BPG254F23.7	G	A	3/148/1434	0.09244	1	5/117/1461	0.07701	0.1043
p21.32	rs3873444	6	32714947		MTCO3P1	XXbac-BPG254F23.7	A	G	36/455/1095	0.2771	0.1743	38/366/1181	0.24	0.142
p21.32	rs6936863	6	32716252		MTCO3P1	XXbac-BPG254F23.7	C	G	100/695/783	0.4063	0.0008164	112/611/856	0.389	0.8461
p21.32	rs6916779	6	32716540		MTCO3P1	XXbac-BPG254F23.7	G	A	53/552/981	0.3288	0.02176	68/502/1014	0.3217	0.5843
p21.32	rs9275652	6	32718045	XXbac-BPG254F23.7			C	G	39/414/1133	0.2621	0.8482	39/412/1134	0.2614	0.8474
p21.32	rs9275655	6	32718141	XXbac-BPG254F23.7			G	A	39/414/1133	0.2621	0.8482	39/412/1133	0.2615	0.8475
p21.32	rs9275659	6	32718326	XXbac-BPG254F23.7			A	C	39/414/1133	0.2621	0.8482	39/412/1134	0.2614	0.8474
p21.32	rs9275686	6	32719793		XXbac-BPG254F23.7	HLA-DQB3	A	G	40/416/1128	0.2641	0.849	42/413/1129	0.2645	0.5686
p21.32	rs9275690	6	32719943		XXbac-BPG254F23.7	HLA-DQB3	A	G	40/416/1130	0.2638	0.7759	42/413/1130	0.2644	0.5685
p21.32	rs9275696	6	32720127		XXbac-BPG254F23.7	HLA-DQB3	G	A	40/416/1127	0.2642	0.849	42/413/1129	0.2645	0.5686
p21.32	rs9275698	6	32720196		XXbac-BPG254F23.7	HLA-DQB3	G	A	148/701/736	0.4312	0.3223	136/690/758	0.4229	0.2588
p21.32	rs9275716	6	32720525		XXbac-BPG254F23.7	HLA-DQB3	A	G	18/261/1307	0.1697	0.2346	17/247/1321	0.1616	0.1604
p21.32	rs9275769	6	32721654		XXbac-BPG254F23.7	HLA-DQB3	G	A	40/416/1129	0.264	0.8489	42/413/1128	0.2647	0.5688
p21.32	rs117522574	6	32722109		XXbac-BPG254F23.7	HLA-DQB3	G	A	20/355/1209	0.2183	0.3561	35/364/1184	0.2366	0.287
p21.32	rs9275793	6	32722250		XXbac-BPG254F23.7	HLA-DQB3	G	A	18/261/1305	0.1699	0.235	17/247/1318	0.1618	0.1611
p21.32	rs9275829	6	32723007		XXbac-BPG254F23.7	HLA-DQB3	G	A	37/412/1124	0.2612	1	41/412/1118	0.265	0.7031
p21.32	rs763026	6	32723968		XXbac-BPG254F23.7	HLA-DQB3	A	G	40/415/1130	0.2635	0.7752	42/413/1129	0.2645	0.5686
p21.32	rs9275936	6	32725156		XXbac-BPG254F23.7	HLA-DQB3	A	G	39/414/1133	0.2621	0.8482	39/412/1134	0.2614	0.8474
p21.32	rs9275970	6	32725838		XXbac-BPG254F23.7	HLA-DQB3	G	A	39/414/1132	0.2622	0.8483	39/412/1134	0.2614	0.8474
p21.32	rs9276024	6	32727487		XXbac-BPG254F23.7	HLA-DQB3	A	G	18/255/1296	0.1683	0.1761	17/242/1316	0.1599	0.1164
p21.32	rs9276093	6	32728993		XXbac-BPG254F23.7	HLA-DQB3	G	A	18/261/1307	0.1697	0.2346	17/247/1319	0.1618	0.1609
p21.32	rs9276132	6	32729978		XXbac-BPG254F23.7	HLA-DQB3	G	A	38/414/1129	0.2619	1	39/412/1131	0.2618	0.8476
p21.32	rs9276149	6	32730379		XXbac-BPG254F23.7	HLA-DQB3	A	G	39/414/1133	0.2621	0.8482	39/412/1134	0.2614	0.8474
p21.32	rs9276160	6	32730644		XXbac-BPG254F23.7	HLA-DQB3	A	G	15/263/1307	0.1678	0.6525	17/245/1323	0.1605	0.1562
p21.32	rs9276172	6	32731170	HLA-DQB3			G	C	41/413/1132	0.2634	0.6339	39/412/1134	0.2614	0.8474
p21.32	rs9276188	6	32731485	HLA-DQB3			G	A	40/413/1133	0.2625	0.7739	39/412/1134	0.2614	0.8474
p21.32	rs9276190	6	32731573	HLA-DQB3			A	G	39/413/1133	0.2618	0.8478	39/412/1134	0.2614	0.8474
p21.32	rs9276296	6	32735153		HLA-DQB3	HLA-DQA2	G	A	18/262/1306	0.1702	0.2369	17/247/1321	0.1616	0.1604
p21.32	rs12183375	6	32737004		HLA-DQB3	HLA-DQA2	A	G	94/538/915	0.3592	0.2285	88/532/931	0.3523	0.3127
p21.32	rs2858880	6	32737107		HLA-DQB3	HLA-DQA2	A	T	7/164/1402	0.1068	0.3398	2/107/1470	0.06783	1
p21.32	rs13214069	6	32737471		HLA-DQB3	HLA-DQA2	A	G	94/547/941	0.3567	0.2307	89/536/940	0.3522	0.2816
p21.32	rs7773407	6	32738621		HLA-DQB3	HLA-DQA2	A	C	94/547/944	0.3562	0.2303	89/538/958	0.3497	0.2503
p21.32	rs117402442	6	32738687		HLA-DQB3	HLA-DQA2	G	A	21/357/1207	0.22	0.4236	39/374/1172	0.2445	0.1807
p21.32	rs9276370	6	32739518		HLA-DQB3	HLA-DQA2	C	A	27/337/1221	0.2163	0.4861	23/294/1268	0.1915	0.2359
p21.32	rs10947337	6	32739774		HLA-DQB3	HLA-DQA2	A	G	94/547/945	0.356	0.2051	89/538/958	0.3497	0.2503
p21.32	rs5018343	6	32742342	HLA-DQA2			A	T	18/274/1279	0.1779	0.4764	21/257/1302	0.1713	0.05443
p21.32	rs9276408	6	32742593	HLA-DQA2			A	C	15/255/1309	0.1642	0.538	17/242/1324	0.1592	0.1146
p21.32	rs9276427	6	32744080	HLA-DQA2			A	G	28/342/1216	0.2195	0.4918	26/315/1244	0.2047	0.2679
p21.32	rs9276431	6	32744470	HLA-DQA2			A	G	27/339/1209	0.2184	0.5637	25/307/1241	0.2012	0.2577
p21.32	rs2301271	6	32757416	HLA-DQB2			A	G	26/340/1213	0.2174	0.7279	25/298/1258	0.1959	0.156
p21.32	rs9276597	6	32766167		HLA-DQB2	HLA-DOB	A	G	40/435/1100	0.2735	0.7822	48/432/1094	0.2792	0.527
p21.32	rs9296043	6	32768326		HLA-DQB2	HLA-DOB	A	G	41/440/1104	0.2751	0.7843	49/432/1104	0.2785	0.4164
p21.32	rs1585892	6	32768847		HLA-DQB2	HLA-DOB	A	G	41/440/1104	0.2751	0.7843	49/432/1102	0.2788	0.4167
p21.32	rs1585891	6	32768945		HLA-DQB2	HLA-DOB	G	A	41/439/1105	0.2747	0.7844	49/431/1105	0.2781	0.3671
p21.32	rs6901084	6	32769159		HLA-DQB2	HLA-DOB	G	A	41/440/1105	0.275	0.7843	49/432/1104	0.2785	0.4164
p21.32	rs6457661	6	32769717		HLA-DQB2	HLA-DOB	G	A	41/440/1104	0.2751	0.7843	49/432/1104	0.2785	0.4164
p21.32	rs2857211	6	32772665		HLA-DQB2	HLA-DOB	A	G	56/452/1074	0.293	0.3447	54/483/1046	0.3036	0.934
p21.32	rs2621408	6	32779765		HLA-DQB2	HLA-DOB	G	C	105/594/887	0.3784	0.6906	110/590/884	0.3806	0.3912
p21.32	rs2857174	6	32786991		HLA-DQB2	HLA-DOB	A	G	105/594/887	0.3784	0.6906	110/591/884	0.3808	0.4284
p21.32	rs34408145	6	32787400		HLA-DQB2	HLA-DOB	G	A	24/264/1298	0.1774	0.02211	13/271/1296	0.1703	0.883
p21.32	rs2621387	6	32790194		HLA-DQB2	HLA-DOB	C	A	103/596/883	0.3785	0.8422	111/589/883	0.3811	0.3558
p21.32	rs2621384	6	32791496		HLA-DQB2	HLA-DOB	G	A	105/595/886	0.3788	0.6912	110/590/885	0.3805	0.3909
p21.32	rs2857161	6	32791520		HLA-DQB2	HLA-DOB	G	A	105/596/884	0.3792	0.7406	111/589/884	0.3809	0.3556
p21.32	rs35486885	6	32795729		HLA-DQB2	HLA-DOB	G	A	31/280/1269	0.193	0.002396	19/290/1272	0.1859	0.5877
p21.32	rs34710970	6	32800338		HLA-DQB2	HLA-DOB	G	A	25/277/1284	0.1849	0.02989	14/282/1288	0.1766	0.8866
p21.32	rs41258084	6	32813180	HLA-DOB			A	G	25/277/1284	0.1849	0.02989	14/281/1289	0.176	0.8865
p21.32	rs17213756	6	32820219	TAP2			A	G	21/266/1299	0.1753	0.08553	14/265/1304	0.168	0.8808
p21.32	rs3819717	6	32836522	TAP2			G	A	304/818/462	0.495	0.09391	316/808/460	0.4959	0.2652
p21.32	rs17583244	6	32836910	TAP2			G	A	18/278/1290	0.1784	0.4807	14/219/1351	0.1438	0.158
p21.32	rs2239701	6	32837272	TAP2			A	G	222/763/599	0.4717	0.4243	261/704/619	0.4745	0.01277
p21.32	rs6924102	6	32843606	PSMB8			A	G	363/783/439	0.4989	0.7245	394/744/447	0.4994	0.01805
p21.32	rs113206908	6	32850253	PSMB9			G	A	32/412/1142	0.2551	0.5543	29/406/1150	0.2499	0.3657
p21.32	rs3132131	6	32931708		HLA-Z	HLA-DMB	A	G	113/669/803	0.4052	0.107	152/644/789	0.4192	0.2307
p21.32	rs23544	6	32935860	HLA-DMB			A	G	181/717/688	0.4489	0.823	208/773/603	0.4689	0.1083
p21.32	rs68600	6	32935947	HLA-DMB			A	G	200/732/654	0.459	0.8697	256/774/555	0.4822	0.6393
p21.32	rs171329	6	32936884	HLA-DMB			A	G	283/778/525	0.4884	0.8775	331/771/482	0.4955	0.4782
p21.32	rs194675	6	32937969	HLA-DMB			A	T	174/697/708	0.4428	0.9095	211/726/642	0.4627	0.8278
p21.32	rs189865	6	32946553	XXbac-BPG181M17.5			A	G	162/675/749	0.4315	0.6005	201/722/662	0.4577	0.8692
p21.32	rs194682	6	32946836	XXbac-BPG181M17.5			A	G	161/676/748	0.4314	0.6417	201/722/658	0.4582	0.9126
p21.32	rs209475	6	32957808	HLA-DMA			A	G	165/683/738	0.4347	0.7289	207/717/661	0.459	0.5842
p21.32	rs129653	6	32963759	HLA-DMA			G	A	164/684/737	0.4347	0.7728	207/717/661	0.459	0.5842
p21.32	rs206786	6	32967402	HLA-DMA			C	A	183/705/697	0.4474	0.8224	221/730/634	0.4661	0.6663
p21.32	rs3128947	6	32997285		BRD2	HLA-DOA	G	A	25/301/1260	0.1968	0.1596	12/286/1287	0.1765	0.4753
p21.32	rs422544	6	33058333		HLA-DOA	HLA-DPA1	C	A	56/431/1099	0.2838	0.09283	43/383/1158	0.2523	0.1101
p21.32	rs2301226	6	33066819	HLA-DPA1			A	G	27/298/1255	0.198	0.0736	17/266/1300	0.1716	0.3809
p21.32	rs2567279	6	33078885	HLA-DPA1			G	A	57/427/1097	0.2836	0.06223	46/396/1139	0.261	0.1223
p21.32	rs9277356	6	33080917	HLA-DPB1			A	G	228/729/628	0.4682	0.4857	223/704/658	0.4623	0.1155
p21.32	rs928976	6	33081434	HLA-DPB1			G	A	210/687/665	0.4576	0.1353	203/687/681	0.4537	0.1487
p21.32	rs9501255	6	33087321		HLA-DPB1	HLA-DPA2	A	G	65/463/1053	0.3047	0.1175	52/466/1061	0.2958	0.9322
p21.32	rs9501257	6	33087578		HLA-DPB1	HLA-DPA2	G	A	98/517/943	0.3529	0.0214	84/497/981	0.3351	0.04943
p21.32	rs9501258	6	33087583		HLA-DPB1	HLA-DPA2	G	A	59/440/1050	0.2953	0.1431	51/444/1058	0.2898	0.5993
p21.32	rs9501259	6	33087774		HLA-DPB1	HLA-DPA2	A	G	84/515/986	0.3381	0.1192	63/499/1023	0.3166	0.8121
p21.32	rs9501260	6	33088873		HLA-DPB1	HLA-DPA2	A	G	75/507/1002	0.3288	0.2853	71/499/1015	0.3226	0.3499
p21.32	rs9501260	6	33088873		HLA-DPB1	HLA-DPA2	A	G	75/507/1002	0.3288	0.2853	71/499/1015	0.3226	0.3499
p21.32	rs9296076	6	33089063		HLA-DPB1	HLA-DPA2	G	A	98/550/937	0.3599	0.1625	84/524/976	0.3414	0.2114
p21.32	rs9501262	6	33089213		HLA-DPB1	HLA-DPA2	A	G	75/508/1002	0.329	0.3206	71/495/1016	0.3216	0.2744
p21.32	rs73743105	6	33089217		HLA-DPB1	HLA-DPA2	G	C	75/507/1003	0.3286	0.285	70/498/1016	0.3217	0.3899
p21.32	rs73743106	6	33089327		HLA-DPB1	HLA-DPA2	G	A	75/508/1002	0.329	0.3206	71/498/1016	0.3223	0.3115
p21.32	rs9501263	6	33089574		HLA-DPB1	HLA-DPA2	A	G	96/487/1000	0.3369	0.0007571	84/485/1016	0.3271	0.01121
p21.32	rs9501263	6	33089574		HLA-DPB1	HLA-DPA2	A	G	96/487/1000	0.3369	0.0007571	84/485/1016	0.3271	0.01121
p21.32	rs3097650	6	33089663		HLA-DPB1	HLA-DPA2	G	A	239/730/616	0.4717	0.3653	231/697/656	0.464	0.03971
p21.32	rs7763822	6	33092651	HLA-DPA2			A	G	73/456/1054	0.308	0.01132	67/452/1059	0.3024	0.03744
p21.32	rs9461833	6	33093415	HLA-DPA2			A	G	65/464/1057	0.3044	0.137	52/466/1064	0.2954	0.9321
p21.1	rs72855725	6	44557955		RP3-449H6.1	SUPT3H	C	A	4/115/1466	0.07459	0.2943	4/110/1471	0.07168	0.2742
q13	rs7773157	6	70136130	COL19A1			A	G	145/657/784	0.4188	0.6747	116/604/863	0.3887	0.4769
q15	rs78598955	6	89269986	GABRR2			C	A	0/48/1537	0.02983	1	0/37/1548	0.02307	1
q16.3	rs75754187	6	104565776		NPM1P10	RP11-427E4.1	G	A	16/301/1268	0.188	0.7897	19/323/1242	0.2019	0.8035
q11.23	rs73366469	7	74619286		RP5-1186P10.2	GTF2I	G	A	11/260/1315	0.162	0.7568	18/258/1309	0.1683	0.1805
q11.23	rs12674357	7	77426065		RP5-899E9.1	GCNT1P5	G	A	257/724/605	0.4759	0.1022	285/776/520	0.489	0.9181
q21.13	rs10233510	7	89141313	ZNF804B			G	A	245/772/568	0.4792	0.5297	295/771/518	0.4901	0.7977
q21.13	rs7776995	7	89147277	ZNF804B			A	C	211/725/650	0.4617	0.7035	240/738/607	0.4732	0.5244
q32.1	rs1043550	7	128769171	CALU			G	A	12/248/1326	0.1568	0.8727	9/209/1367	0.133	0.7046
q32.1	rs1799922	7	128775141	OPN1SW			C	A	13/254/1319	0.161	0.7567	10/211/1364	0.1351	0.5743
q32.1	rs1565628	7	128809333	CCDC136			A	G	61/524/1000	0.3245	0.4866	53/501/1031	0.3096	0.4651
q32.1	rs4731530	7	128922524		RP11-309L24.6	IRF5	G	A	291/772/522	0.4894	0.8776	276/761/547	0.4854	0.6791
q32.1	rs729302	7	128928906		RP11-309L24.6	IRF5	C	A	159/636/791	0.4206	0.0643	165/683/737	0.4349	0.7289
q32.1	rs57939992	7	129024628	TNPO3			A	G	67/420/1099	0.2883	0.001648	56/509/1020	0.315	0.4737
q32.1	rs1901198	7	129069735		RP11-128A6.3	RP11-286H14.2	G	A	321/735/530	0.4913	0.02452	274/746/564	0.4832	0.3232
p23.1	rs2254546	8	11486171		FAM167A	BLK	A	G	79/572/935	0.3543	0.5236	84/582/919	0.3612	0.5322
p23.1	rs13277113	8	11491677		FAM167A	BLK	G	A	174/709/693	0.4458	0.7348	155/699/718	0.4359	0.452
p23.1	rs2618476	8	11495032	BLK			A	G	166/714/706	0.442	0.4955	151/700/734	0.4324	0.4162
p23.1	rs2618479	8	11498312	BLK			A	G	77/578/930	0.3552	0.322	88/585/912	0.3649	0.6799
p23.1	rs1600249	8	11502129	BLK			C	A	202/714/667	0.4569	0.6206	170/705/709	0.4421	0.8203
p21.3	rs10091786	8	23281923	R3HCC1			G	A	8/239/1328	0.1488	0.6094	6/158/1409	0.1022	0.4551
q24.21	rs3888123	8	128092827	PVT1			G	A	67/471/1047	0.3089	0.1427	49/474/1062	0.2958	0.734
p24.2	rs6476800	9	4051921	GLIS3			A	G	17/268/1301	0.1723	0.4643	14/287/1284	0.179	0.7786
q26.2	rs7068679	10	128520234		RP11-264E18.1	RP11-442O18.2	A	G	6/108/1472	0.0728	0.02232	0/89/1496	0.05457	0.633
p15.4	rs11030472	11	3978105	STIM1			G	A	41/423/1119	0.2681	0.8517	55/507/1022	0.3137	0.4707
p15.4	rs16924294	11	4645580	OR51E1			G	A	72/520/994	0.331	0.7046	91/579/915	0.3649	1
p14.1	rs7941325	11	28444536	RP11-22P4.1			A	G	5/210/1371	0.1291	0.4338	1/166/1418	0.1004	0.1252
q23.3	rs74844995	11	115701580	AP000797.3			A	G	2/180/1403	0.1094	0.1654	7/158/1417	0.1028	0.2235
q23.3	rs12295914	11	115704277	AP000797.3			A	G	2/177/1407	0.1076	0.2355	6/156/1423	0.1004	0.4457
q23.3	rs6589706	11	118877104		Y_RNA	CXCR5	A	G	335/782/469	0.4964	0.8004	376/736/473	0.4981	0.007503
q23.3	rs523604	11	118885029	CXCR5			G	A	373/752/461	0.4985	0.05552	374/750/461	0.4985	0.04389
p13.31	rs12304686	12	9787528		CD69	RP11-75L1.6	A	C	0/94/1490	0.05758	0.3983	2/84/1491	0.05425	0.3445
p13.1	rs10845606	12	12681960	GPR19			A	C	207/758/620	0.4661	0.3064	216/765/604	0.47	0.3099
q23.3	rs2374050	12	103501399		C12orf42	RP11-626I20.1	A	G	8/251/1327	0.1542	0.4128	12/285/1287	0.176	0.4748
q24.22	rs7299679	12	116458870		MIR4472-2	RP11-148B3.1	A	G	6/227/1353	0.1393	0.3665	14/206/1365	0.1367	0.06271
q24.23	rs3927167	12	118128446	VSIG10			A	C	124/647/815	0.4051	0.8044	117/614/854	0.3919	0.6537
q24.33	rs1385374	12	128816149	SLC15A4			A	G	42/390/1154	0.2542	0.1987	34/413/1138	0.2574	0.6965
q12.11	rs7328274	13	20944587	HNRNPA1P30			A	G	383/765/438	0.4994	0.1748	329/776/480	0.4955	0.6482
q14.11	rs79722196	13	39879308		SNORD116	LINC00332	A	G	13/287/1286	0.1779	0.5733	19/298/1268	0.1895	0.6923
q32.1	rs72649647	13	95437392	CLDN10			A	G	29/342/1215	0.2204	0.3636	18/296/1271	0.1875	0.8932
q32.11	rs56083431	14	91331072	CCDC88C			A	G	2/88/1496	0.05633	0.3834	3/75/1506	0.04983	0.07978
q13.1	rs11639447	15	29333513	FAM189A1			A	G	2/88/1496	0.05633	0.3834	0/62/1522	0.03838	1
q14	rs28515146	15	37552247		RP11-25H11.1	TMCO5A	G	A	4/99/1452	0.06644	0.1058	2/85/1482	0.05512	0.3572
q21.2	rs4405491	15	52223326	MYO5C			A	G	18/312/1256	0.1953	0.8977	12/266/1307	0.1662	0.8795
q21.2	rs3751631	15	52242147	MYO5C			A	G	10/225/1351	0.1425	0.8594	5/174/1406	0.1094	1
q21.2	rs7182755	15	52299265		MYO5C	MYO5A	G	A	55/473/1055	0.3005	0.8022	39/427/1119	0.2679	0.9252
q25.3	rs144726174	15	87758654		RP11-648K4.2	NTRK3	A	G	0/61/1523	0.03777	1	0/68/1516	0.04201	1
p11.2	rs1143679	16	31265490	ITGAM			A	G	4/121/1461	0.07803	0.3272	1/96/1488	0.05992	1
p11.2	rs11860650	16	31315385	ITGAM			A	G	6/200/1378	0.1249	0.8405	3/150/1430	0.09369	1
q22.1	rs1303939	16	68439559	SMPD3			G	A	56/451/1079	0.292	0.302	57/448/1080	0.2917	0.2275
q22.1	rs11075687	16	68621991		RP11-615I2.1	snoU109	A	G	112/641/832	0.3968	0.4862	113/571/901	0.3764	0.09501
q22.1	rs7196626	16	68655516	CDH3			G	A	138/636/802	0.4112	0.4624	134/603/843	0.3993	0.07797
q23.3	rs3784983	16	83744100	CDH13			A	G	398/785/403	0.5	0.688	345/770/469	0.4969	0.3902
q24.3	rs78208831	16	89021297		CTD-2555A7.1	CTD-2555A7.2	A	G	216/752/618	0.4679	0.6291	289/751/544	0.487	0.3021
p11.21	rs11659246	18	12341465	TUBB6			G	A	14/275/1297	0.1728	1	9/273/1303	0.1667	0.2281
q12.1	rs11564296	18	28219995		CDH2	ARIH2P1	G	A	1/60/1525	0.03833	0.4556	4/42/1539	0.03105	0.0004506
q12.1	rs11083266	18	28268854		CDH2	ARIH2P1	A	G	1/62/1516	0.03971	0.4787	0/40/1538	0.02503	1
q22.3	rs34693543	18	73510701		CTD-2354A18.1	RP11-126K15.1	A	G	1/136/1449	0.08323	0.3626	3/114/1468	0.07284	0.4901
q13.31	rs78715017	19	43774764	KCNN4			A	G	0/31/1554	0.01937	1	0/33/1552	0.0206	1
q13.12	rs138428934	20	45573204	WFDC8			G	A	21/303/1243	0.1959	0.6054	10/277/1274	0.1722	0.3013
q13.12	rs3746495	20	45851155	ACOT8			G	A	39/445/1102	0.2754	0.523	37/380/1168	0.2454	0.3568
q13.2	rs2248137	20	54173204	CYP24A1			G	C	196/719/660	0.4566	1	242/700/625	0.4701	0.05296
q22.3	rs2837982	21	41244804	BACE2			G	A	129/639/816	0.4059	0.8045	123/591/871	0.3886	0.1063
q22.3	rs1046210	21	41250859	BACE2			G	A	126/629/830	0.4014	0.6614	95/602/888	0.3748	0.6391
q22.3	rs1109754	21	45333789		LINC00315	BX322557.13	A	G	22/262/1295	0.175	0.04362	4/241/1330	0.1456	0.05389
q13.31	rs5768788	22	46462790	CELSR1			G	A	65/475/1045	0.3089	0.2544	54/494/1037	0.3077	0.683
